# Supplementary material for: Provincial prenatal record revision: a multiple case study of evidence-based decision-making at the population-policy level
Source: PubMed Central journal article supplement (PMC2642799; doi:10.1186/1472-6963-8-266), 2008-12-19
Supplement: 1472-6963-8-266-S2.pdf [file 1472-6963-8-266-S2.pdf]

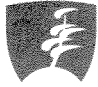

**Laurentian**University  
Université**Laurentienne**

Research, Development &  
Creativity Office  
Bureau de la recherche,  
du développement et de la créativité  
Tel/Tél.: 705-675-1151, 3944  
Fax/Télé.: 705-671-3850

March 17, 2007

Doctor Phyllis Montgomery,  
School of Nursing,  
Laurentian University,

This is to inform you that the study entitled *Provincial Prenatal Record Revision: A multiple case study of evidence-based decision-making at the population-policy level (2007-03-01)*, presented by Phyllis Montgomery and Nancy Edwards has passed an ethics review by the Laurentian University Research Ethics Board.

Ethics approval is valid until March 17 2008. In March 2008, please submit a request for renewal form to the Office of Research as your your research involving human subjects will continue for longer than one year. Should there be any changes to the project the researcher is required to advise the Laurentian University Research Ethics Board. Please ensure that your research complies with TCPS policies.

A report is due in March 2008 and at the end of the project in December 2008.

A handwritten signature in black ink, appearing to read 'R. Schinke', with a long horizontal line extending to the right.

Robert Schinke,  
Acting President, Laurentian Research Ethics Board,  
Department of Human Kinetics,  
Laurentian University
