# Supplementary material for: Provincial prenatal record revision: a multiple case study of evidence-based decision-making at the population-policy level
Source: PubMed Central journal article supplement (PMC2642799; doi:10.1186/1472-6963-8-266), 2008-12-19
Supplement: 1472-6963-8-266-S4.pdf [file 1472-6963-8-266-S4.pdf]

## HEALTH RESEARCH ETHICS APPROVAL FORM

**Date:** March 2007

**Name of Applicant:** Dr. Beverly Williams

**Organization:** U of A

**Department:** Faculty of Nursing

**Project Title:** Provincial prenatal record revision: A multiple case study of evidence-based decision-making at the population-policy level

The Health Research Ethics Board (HREB) has reviewed the protocol for this project and found it to be acceptable within the limitations of human experimentation. The HREB has also reviewed and approved the subject information letter and consent form.

The approval for the study as presented is valid for one year. It may be extended following completion of the yearly report form. Any proposed changes to the study must be submitted to the Health Research Ethics Board for approval. Written notification must be sent to the HREB when the project is complete or terminated.

**Special Comments:**

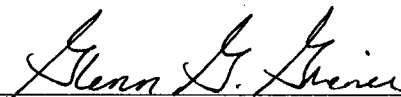

Dr. Glenn Griener, PhD  
Chair of the Health Research Ethics Board  
(B: Health Research)

MAR 22 2007

Date of Approval Release

File Number: B-320307
